# Supplementary material
Source: Springer Nature journal article supplement (https://www.springermedizin.de/resource/supplementary/12916_2013_909_MOESM5_ESM.pdf/9598808)
Supplement: MOESM5 [file 9598808]

**Additional file 5a: Numbers and proportion of physician agreement by stage of coding**

| Cause of death                     | Initial   |       | Reconciliation |       | Adjudication |       | Total |
|------------------------------------|-----------|-------|----------------|-------|--------------|-------|-------|
|                                    | Agreement | %     | Agreement      | %     | Agreement    | %     |       |
| <b>Communicable</b>                |           |       |                |       |              |       |       |
| Malaria                            | 1378      | 65.9% | 323            | 15.4% | 390          | 18.7% | 2091  |
| Tuberculosis                       | 4620      | 80.4% | 539            | 9.4%  | 588          | 10.2% | 5747  |
| HIV/STI                            | 352       | 76.5% | 51             | 11.1% | 57           | 12.4% | 460   |
| Other infectious diseases          | 4272      | 60.8% | 1336           | 19.0% | 1424         | 20.3% | 7032  |
| Maternal conditions                | 634       | 63.4% | 246            | 24.6% | 120          | 12.0% | 1000  |
| Nutritional conditions             | 172       | 41.5% | 112            | 27.1% | 130          | 31.4% | 414   |
| <b>Non-communicable</b>            |           |       |                |       |              |       |       |
| Cancer                             | 3735      | 66.1% | 1023           | 18.1% | 891          | 15.8% | 5649  |
| Heart diseases                     | 5843      | 75.2% | 949            | 12.2% | 973          | 12.5% | 7765  |
| Stroke                             | 3452      | 65.1% | 999            | 18.8% | 855          | 16.1% | 5306  |
| Other CVD                          | 621       | 42.8% | 383            | 26.4% | 448          | 30.9% | 1452  |
| Chronic respiratory disease        | 4235      | 71.7% | 793            | 13.4% | 882          | 14.9% | 5910  |
| Cirrhosis of the liver             | 1695      | 55.2% | 759            | 24.7% | 615          | 20.0% | 3069  |
| Other digestive diseases           | 641       | 41.2% | 426            | 27.4% | 489          | 31.4% | 1556  |
| Renal and other endocrine diseases | 1691      | 61.4% | 545            | 19.8% | 518          | 18.8% | 2754  |
| Other chronic diseases             | 941       | 45.1% | 588            | 28.2% | 557          | 26.7% | 2086  |
| <b>Injury</b>                      |           |       |                |       |              |       |       |
| Road traffic accidents             | 1844      | 68.9% | 549            | 20.5% | 282          | 10.5% | 2675  |
| Suicides                           | 2276      | 68.9% | 670            | 20.3% | 355          | 10.8% | 3301  |
| Other injuries                     | 3091      | 60.5% | 1191           | 23.3% | 825          | 16.2% | 5107  |
| <b>Ill-defined conditions</b>      | 2074      | 47.5% | 780            | 17.9% | 1514         | 34.7% | 4368  |
| <b>All</b>                         | 43567     | 64.3% | 12262          | 18.1% | 11913        | 17.6% | 67742 |

## Additional file 5b: Number of records and CSMF by cause of death and stage of physician coding

|                                    | Physician 1 initial code |             |             | Physician 2 initial code |             |             | Sum of initial codes |             |             | Aggregate (all stages**) |             |               | Final code   |             |
|------------------------------------|--------------------------|-------------|-------------|--------------------------|-------------|-------------|----------------------|-------------|-------------|--------------------------|-------------|---------------|--------------|-------------|
|                                    | No.                      | CSMF        | Error*      | No.                      | CSMF        | Error*      | No.                  | CSMF        | Error*      | No.                      | CSMF        | Error*        | No.          | CSMF        |
| <b>Communicable</b>                |                          |             |             |                          |             |             |                      |             |             |                          |             |               |              |             |
| Malaria                            | 1997                     | 3.3%        | -0.1%       | 1979                     | 3.2%        | -0.2%       | 3976                 | 3.2%        | -0.1%       | 5783                     | 3.2%        | -0.1%         | 2076         | 3.4%        |
| Tuberculosis                       | 5524                     | 9.0%        | -0.2%       | 5489                     | 8.9%        | -0.3%       | 11013                | 9.0%        | -0.3%       | 13761                    | 7.7%        | -1.5%         | 5670         | 9.2%        |
| HIV/STI                            | 435                      | 0.7%        | 0.0%        | 423                      | 0.7%        | 0.0%        | 858                  | 0.7%        | 0.0%        | 1107                     | 0.6%        | -0.1%         | 434          | 0.7%        |
| Other infectious diseases          | 6721                     | 11.0%       | -0.3%       | 6547                     | 10.7%       | -0.6%       | 13268                | 10.8%       | -0.5%       | 19970                    | 11.2%       | -0.1%         | 6918         | 11.3%       |
| Maternal conditions                | 846                      | 1.4%        | -0.1%       | 847                      | 1.4%        | -0.1%       | 1693                 | 1.4%        | -0.1%       | 2695                     | 1.5%        | 0.1%          | 889          | 1.4%        |
| Nutritional conditions             | 409                      | 0.7%        | 0.1%        | 403                      | 0.7%        | 0.0%        | 812                  | 0.7%        | 0.0%        | 1443                     | 0.8%        | 0.2%          | 377          | 0.6%        |
| <b>Non-communicable</b>            |                          |             |             |                          |             |             |                      |             |             |                          |             |               |              |             |
| Cancer                             | 5331                     | 8.7%        | -0.2%       | 5320                     | 8.7%        | -0.2%       | 10651                | 8.7%        | -0.2%       | 14967                    | 8.4%        | -0.5%         | 5449         | 8.9%        |
| Heart Diseases                     | 7278                     | 11.9%       | -0.4%       | 7370                     | 12.0%       | -0.2%       | 14648                | 11.9%       | -0.3%       | 19000                    | 10.7%       | -1.6%         | 7513         | 12.2%       |
| Stroke (cerebrovascular disease)   | 4366                     | 7.1%        | -0.2%       | 4277                     | 7.0%        | -0.4%       | 8643                 | 7.0%        | -0.3%       | 12457                    | 7.0%        | -0.4%         | 4505         | 7.3%        |
| Other CVD                          | 726                      | 1.2%        | 0.1%        | 744                      | 1.2%        | 0.1%        | 1470                 | 1.2%        | 0.1%        | 2541                     | 1.4%        | 0.3%          | 665          | 1.1%        |
| Chronic Respiratory diseases       | 5506                     | 9.0%        | 0.1%        | 5563                     | 9.1%        | 0.2%        | 11069                | 9.0%        | 0.1%        | 14979                    | 8.4%        | -0.5%         | 5449         | 8.9%        |
| Cirrhosis of the Liver             | 2397                     | 3.9%        | -0.1%       | 2474                     | 4.0%        | 0.0%        | 4871                 | 4.0%        | 0.0%        | 7816                     | 4.4%        | 0.4%          | 2448         | 4.0%        |
| Other digestive diseases           | 1415                     | 2.3%        | 0.0%        | 1406                     | 2.3%        | 0.0%        | 2821                 | 2.3%        | 0.0%        | 5046                     | 2.8%        | 0.6%          | 1398         | 2.3%        |
| Renal and other endocrine diseases | 2413                     | 3.9%        | -0.1%       | 2431                     | 4.0%        | -0.1%       | 4844                 | 3.9%        | -0.1%       | 7273                     | 4.1%        | 0.0%          | 2479         | 4.0%        |
| Other chronic diseases             | 1722                     | 2.8%        | 0.1%        | 1730                     | 2.8%        | 0.1%        | 3452                 | 2.8%        | 0.1%        | 6128                     | 3.4%        | 0.7%          | 1662         | 2.7%        |
| <b>Injuries</b>                    |                          |             |             |                          |             |             |                      |             |             |                          |             |               |              |             |
| Road traffic accidents             | 1986                     | 3.2%        | -0.1%       | 1980                     | 3.2%        | -0.1%       | 3966                 | 3.2%        | -0.1%       | 5525                     | 3.1%        | -0.2%         | 2044         | 3.3%        |
| Suicides                           | 2564                     | 4.2%        | -0.1%       | 2480                     | 4.0%        | -0.2%       | 5044                 | 4.1%        | -0.2%       | 6986                     | 3.9%        | -0.4%         | 2632         | 4.3%        |
| Other injuries                     | 4209                     | 6.9%        | 0.0%        | 4289                     | 7.0%        | 0.1%        | 8498                 | 6.9%        | 0.0%        | 12859                    | 7.2%        | 0.3%          | 4225         | 6.9%        |
| <b>Ill-defined conditions</b>      | 5470                     | 8.9%        | 1.6%        | 5591                     | 9.1%        | 1.7%        | 11061                | 9.0%        | 1.7%        | 17814                    | 10.0%       | 2.6%          | 4520         | 7.4%        |
| <b>All</b>                         | <b>61315</b>             | <b>100%</b> | <b>3.9%</b> | <b>61343</b>             | <b>100%</b> | <b>4.8%</b> | <b>122658</b>        | <b>100%</b> | <b>4.2%</b> | <b>178150</b>            | <b>100%</b> | <b>10.58%</b> | <b>61353</b> | <b>100%</b> |

\*CSMF absolute error compared to final assigned codes

\*\* Including initial coding, reconciliation, and adjudication
